1  
2  
3  
4  
5  
6  
7  
8  
9  
10  
11  
12  
13  
14  
15  
16  
17  
18  
19  
20  
21  
22  
23  
24  
25  
26  
27  
28  
29  
30  
31  
32  
33  
34  
35  
36  
37  
38  
39  
40  
41  
42  
43

**A phenotypic rescue approach identifies lineage regionalization defects in a mouse model of DiGeorge syndrome.**

Gabriella Lania<sup>1\*</sup>, Monica Franzese<sup>2,3</sup>, Adachi Noritaka<sup>4#</sup>, Marchesa Bilio<sup>1</sup>, Annalaura Russo<sup>1</sup>, Erika D'Agostino<sup>1</sup>, Claudia Angelini<sup>2</sup>, Robert G. Kelly<sup>4</sup>, Antonio Baldini<sup>1,5\*</sup>

1) Institute of Genetics and Biophysics, and 2) Istituto per le Applicazione del Calcolo, National Research Council (CNR), Naples, Italy.

3) IRCCS SDN, Naples, Italy.

4) Aix-Marseille Université, CNRS UMR 7288, IBDM, Marseille, France

5) Department of Molecular Medicine and Medical Biotechnology, University Federico II, Naples, Italy

#New address: Department of Biology, Faculty of Science, Toho University, Chiba, Japan.

\* Correspondence to Antonio Baldini ([antonio.baldini@unina.it](mailto:antonio.baldini@unina.it)) or Gabriella Lania ([gabriella.lania@igb.cnr.it](mailto:gabriella.lania@igb.cnr.it))

44  
45  
46  
47  
48  
49  
50  
51  
52  
53  
54  
55  
56  
57  
58  
59  
60  
61  
62  
63  
64  
65  
66  
67  
68  
69  
70  
71  
72  
73  
74  
75  
76  
77  
78  
79  
80  
81  
82  
83  
84  
85  
86

## ABSTRACT

*TBX1* is a key regulator of pharyngeal apparatus (PhAp) development. Vitamin B12 treatment partially rescues aortic arch patterning defects of *Tbx1*<sup>+/-</sup> embryos. Here we show that it also improves cardiac outflow tract septation and branchiomic muscle anomalies of *Tbx1* hypomorphic mutants. At molecular level, the in vivo vB12 treatment let us to identify genes that were dysregulated by *Tbx1* haploinsufficiency and rescued by treatment. We found that SLUG, encoded by the rescued gene *Snai2*, identified a population of mesodermal cells that was partially overlapping with but distinct from ISL1+ and TBX1+ populations. In addition, SLUG+ cells were mislocalized and had a greater tendency to aggregate in *Tbx1*<sup>+/-</sup> and *Tbx1*<sup>-/-</sup> embryos and vB12 treatment restore cellular distribution. Adjacent neural crest-derived mesenchymal cells, which do not express TBX1, were also affected, showing enhanced segregation from cardiopharyngeal mesodermal cells. We propose that TBX1 regulates cell distribution in core mesoderm and the arrangement of multiple lineages within the PhAp.

**Keywords:** TBX1, DiGeorge syndrome, Pharyngeal apparatus, Cardiopharyngeal mesoderm, phenotypic rescue.

87

88

## 89 INTRODUCTION

90

91 The embryonic pharyngeal apparatus (PhAp) is a developmental system that  
92 provides progenitors and instructions to multiple organs and tissues, including but  
93 not limited to the craniofacial and mediastinic muscles and bones, most of the heart,  
94 and glands such as thymus, parathyroids and thyroid. Developmental anomalies of  
95 the PhAp underlie numerous birth defects, highlighting its developmental and  
96 genetic complexity. A textbook example of PhAp maldevelopment is DiGeorge  
97 syndrome, the most common genetic cause of which is a heterozygous deletion of a  
98 chromosomal region within 22q11.2 (in which case the clinical presentation is more  
99 complex and is designated as 22q11.2 deletion syndrome), and it can also be caused  
100 by point mutations of the *TBX1* gene (Haddad et al., 2019; Paylor et al., 2006; Xu et  
101 al., 2014; Yagi et al., 2003; Zweier et al., 2007).

102 The development of the PhAp depends upon the contribution of tissues  
103 derived from all three germ layers: surface ectoderm, pharyngeal endoderm, neural  
104 crest-derived cells (NCCs) and the cardiopharyngeal mesoderm (CPM). The latter  
105 contributes to a broad range of tissues and structures within the mediastinum and  
106 face and neck (Adachi et al., 2020). In the mouse, the CPM is well represented by the  
107 expression domains of the *Tbx1<sup>Cre</sup>* and the *Mef2c-AHF-Cre* drivers (Adachi et al.,  
108 2020; Huynh et al., 2007; Verzi et al., 2005). PhAp lineages have distinct origins and  
109 transcriptional profiles (Swedlund and Lescroart, 2020; Wang et al., 2019), develop  
110 in close proximity or direct contact with each other, and their regionalization within  
111 the PhAp is mostly conserved across vertebrate evolution (Graham, 2001). However,  
112 the molecular code that governs regionalization has not been dissected in detail,  
113 although interactions between lineages are the subject of intense research (Calmont  
114 et al., 2009; Huang et al., 1998; Kodo et al., 2017; Mao et al., 2021; Sato et al., 2011;  
115 Shone and Graham, 2014; Warkala et al., 2020).

116 Loss of function of the *Tbx1* gene in the mouse has profound and broad  
117 effects on the development of the PhAp (Jerome and Papaioannou, 2001; Lindsay et  
118 al., 2001; Merscher et al., 2001), and affects the expression of thousands of genes  
119 (Fulcoli et al., 2016; Ivins et al., 2005; Liao et al., 2008; Pane et al., 2012), making it  
120 difficult to identify the effectors/targets that are critical for specific developmental  
121 functions. Phenotypic rescue strategies represent an alternative approach to focus  
122 on genes associated with phenotypic improvement.

123 In a search for drugs that rebalance *Tbx1* haploinsufficiency, we showed that  
124 high doses of vitamin B12 (vB12) rescued part of the mutant phenotype *in vivo*  
125 (Lania et al., 2016). Here, we show that the rescuing capacity of the drug extends to  
126 CPM-derived structures, such as the cardiac outflow tract and craniofacial muscles.  
127 Then, as a proof of principle of the usefulness of phenotypic rescue to provide  
128 insights into pathogenetic mechanisms, we leveraged vB12 treatment to identify  
129 genes and pathways that are critical for the expressivity of the rescued phenotype.

130 This exposed a novel *Tbx1* mutant phenotype through the identification of a SLUG-  
131 positive subpopulation of CPM cells. Specifically, we found that in *Tbx1* homozygous  
132 mutants, SLUG+ cells were segregated from the NCCs rather than intermingled with  
133 them, suggesting a cell sorting defect. This abnormality was also evident in *Tbx1*  
134 heterozygous mutants, albeit at a reduced expressivity. Thus, in the PhAp, TBX1  
135 dosage is important, cell autonomously and non-autonomously, for the  
136 regionalization of cell lineages. We propose that this TBX1-dependent function is  
137 part of the pathogenetic mechanism leading to severe abnormalities of the PhAp in  
138 the mouse mutants as well as in DiGeorge syndrome.

139

140

141

142

143

144

145

146

147

148

149

150

151

152

153

154

155

156

157

158

159

160

161

162

163

164

165

166

167

168

169

170

171

172

173 **RESULTS**

174

175 *Vitamin B12 reduces the severity of the intracardiac and craniofacial phenotypes in a*  
 176 *hypomorphic Tbx1 mutant model.*

177 High dosage of vB12 reduced the penetrance of the aortic arch phenotype  
 178 and rebalanced *Tbx1* expression in haploinsufficient mice (Lania et al., 2016).  
 179 However, *Tbx1*<sup>+/-</sup> embryos rarely show second heart field (SHF)-related  
 180 abnormalities such as outflow tract defects, which are commonly found in embryos  
 181 that express low levels of *Tbx1* (Liao et al., 2004; Zhang and Baldini, 2008) or in  
 182 *Tbx1*<sup>-/-</sup> embryos (Jerome and Papaioannou, 2001; Lindsay et al., 2001; Merscher et  
 183 al., 2001). We asked whether vB12 treatment, could modify the SHF-dependent  
 184 phenotype on a *Tbx1* reduced-dosage model. To this end, we exploited a  
 185 hypomorphic *Tbx1* allele (*Tbx1*<sup>neo2</sup>) (Zhang et al., 2006) that has a loxP-flanked  
 186 neomycin resistance gene inserted into an intron. *Tbx1*<sup>neo2/-</sup> embryos exhibit heart  
 187 defects similar to but less severe than null embryos (Zhang and Baldini, 2008). We  
 188 crossed *Tbx1*<sup>neo2/+</sup> and *Tbx1*<sup>+/-</sup> mice, and injected pregnant females daily from  
 189 embryonic day (E) 7.5 to E11.5 with vB12 (intraperitoneal, i.p. injection,  
 190 20mg/Kg/day) or vehicle (PBS, controls). Embryos were harvested and dissected at  
 191 E15.5 and E18.5. Table 1 summarizes the phenotyping results. We examined 17  
 192 *Tbx1*<sup>neo2/-</sup> embryos at E18.5 (8 controls and 9 treated with vB12).

193

194 **Table1** Summary of heart morphology phenotyping data

| Genotype                      | n | Treatment | Normal | VSD     | OvAo    | DORV   | incPTA | PTA     |
|-------------------------------|---|-----------|--------|---------|---------|--------|--------|---------|
| E18.5                         |   |           |        |         |         |        |        |         |
| <i>Tbx1</i> <sup>neo2/-</sup> | 8 | PBS       | 0      | 8(100%) | 0       | 0      | 0      | 8(100%) |
| <i>Tbx1</i> <sup>neo2/-</sup> | 9 | vB12      | 1(11%) | 8(100%) | 2(25%)  | 2(22%) | 4(44%) | 2(22%)  |
| E15.5                         |   |           |        |         |         |        |        |         |
| <i>Tbx1</i> <sup>neo2/-</sup> | 5 | PBS       | 0      | 5(100%) | 0       | 0      | 0      | 5(100%) |
| <i>Tbx1</i> <sup>neo2/-</sup> | 3 | vB12      | 0      | 3(100%) | 3(100%) | 0      | 0      | 0       |

195 *DORV: Double outlet right ventricle; OvAo: overriding aorta; incPTA:*  
 196 *incomplete PTA; PTA: persistent truncus arteriosus; VSD: ventricular septal*  
 197 *defects.*

198

199 All control *Tbx1*<sup>neo2/-</sup> embryos had persistent truncus arteriosus (PTA) and  
 200 ventricular septal defects (VSD) (Fig. 1A-A'). In contrast, only 2 of the 9 B12-treated  
 201 embryos exhibited typical PTA (Fig. 1B), while 4 had an incomplete PTA, in which  
 202 there was an unseptated valve but a distal separation of the aorta and pulmonary  
 203 trunk (Fig. 1B'), and 2 had double outlet right ventricle (DORV) (Fig. 1-B''). All  
 204 embryos had a VSD, with the exception of one embryo, which had an apparently  
 205 normal heart (Fig. 1C', Supplementary Fig. 1). In addition, we have examined  
 206 histologically a set of 5 control and 3 vB12-treated *Tbx1*<sup>neo2/-</sup> embryos at E15.5. All  
 207 control embryos had VSD and PTA, while the B12-treated embryos had VSD and  
 208 overriding of the aorta, but no PTA (Table 1 and Supplementary Fig. 2).

209  
210

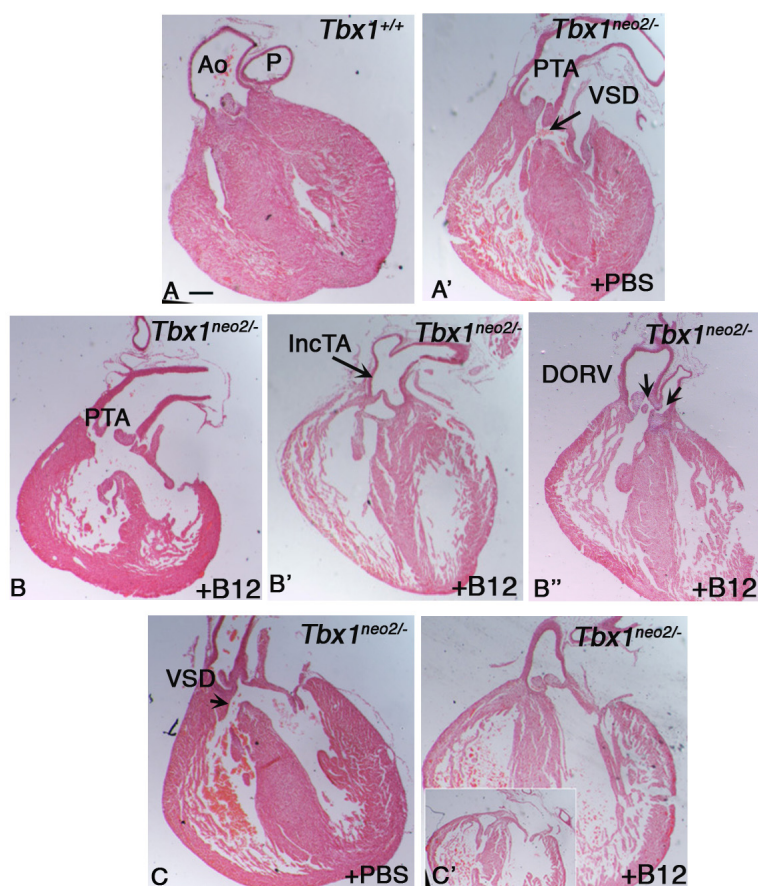

211  
212

213 **Figure 1.** Vitamin B12 ameliorates cardiac outflow tract anomalies observed in  $Tbx1^{neo2/-}$   
214 mouse embryos. Representative images of histological sections (coronal) of heart from  $Tbx1^{+/+}$   
215 and  $Tbx1^{neo2/-}$  embryos at E18.5, treated with vB12 or PBS. A) Histological sections of hearts  
216 from  $Tbx1^{+/+}$  +PBS and B)  $Tbx1^{neo2/-}$  +PBS control embryos. Aorta (Ao) and pulmonary trunk (P)  
217 are separated. C,D,E) Histological sections of hearts from  $Tbx1^{neo2/-}$  + vB12 embryos; PTA:  
218 Persistent truncus arteriosus; IncTA: incomplete truncus arteriosus; DORV: double outlet right  
219 ventricle. F) Histological sections of hearts from  $Tbx1^{neo2/-}$  +PBS and G) vB12 treated embryos;  
220 VSD: ventricular septal defect. Scale bar: 200  $\mu$ m

221

222 Reduced dosage of  $Tbx1$  causes specific craniofacial muscle anomalies (Adachi et al., 2020;  
223 Dastjerdi et al., 2007; Kelly et al., 2004). We tested a set of 5 controls and 3 B12-treated  
224  $Tbx1^{neo2/-}$  embryos at E15.5 and scored the craniofacial muscle phenotype (Fig. 2 and  
225 Supplementary Fig. 3). Results showed that vB12 treatment reduced the severity of anomalies  
226 of the muscles originating from the 1st pharyngeal arch (PA); bilateral defects of the anterior  
227 digastric muscles in  $Tbx1^{neo2/-}$  embryos reduced from 60% to 33% after vB12 treatment.  
228 Defects of 2nd PA-derived branchiomeric muscles were also rescued by vB12 treatment (Fig.  
229 2 and Supplementary Table 1). However, it did not have any effect on muscles derived from  
230 more posterior PAs (Supplementary Fig. 3 and Supplementary Table 1).

231  
232

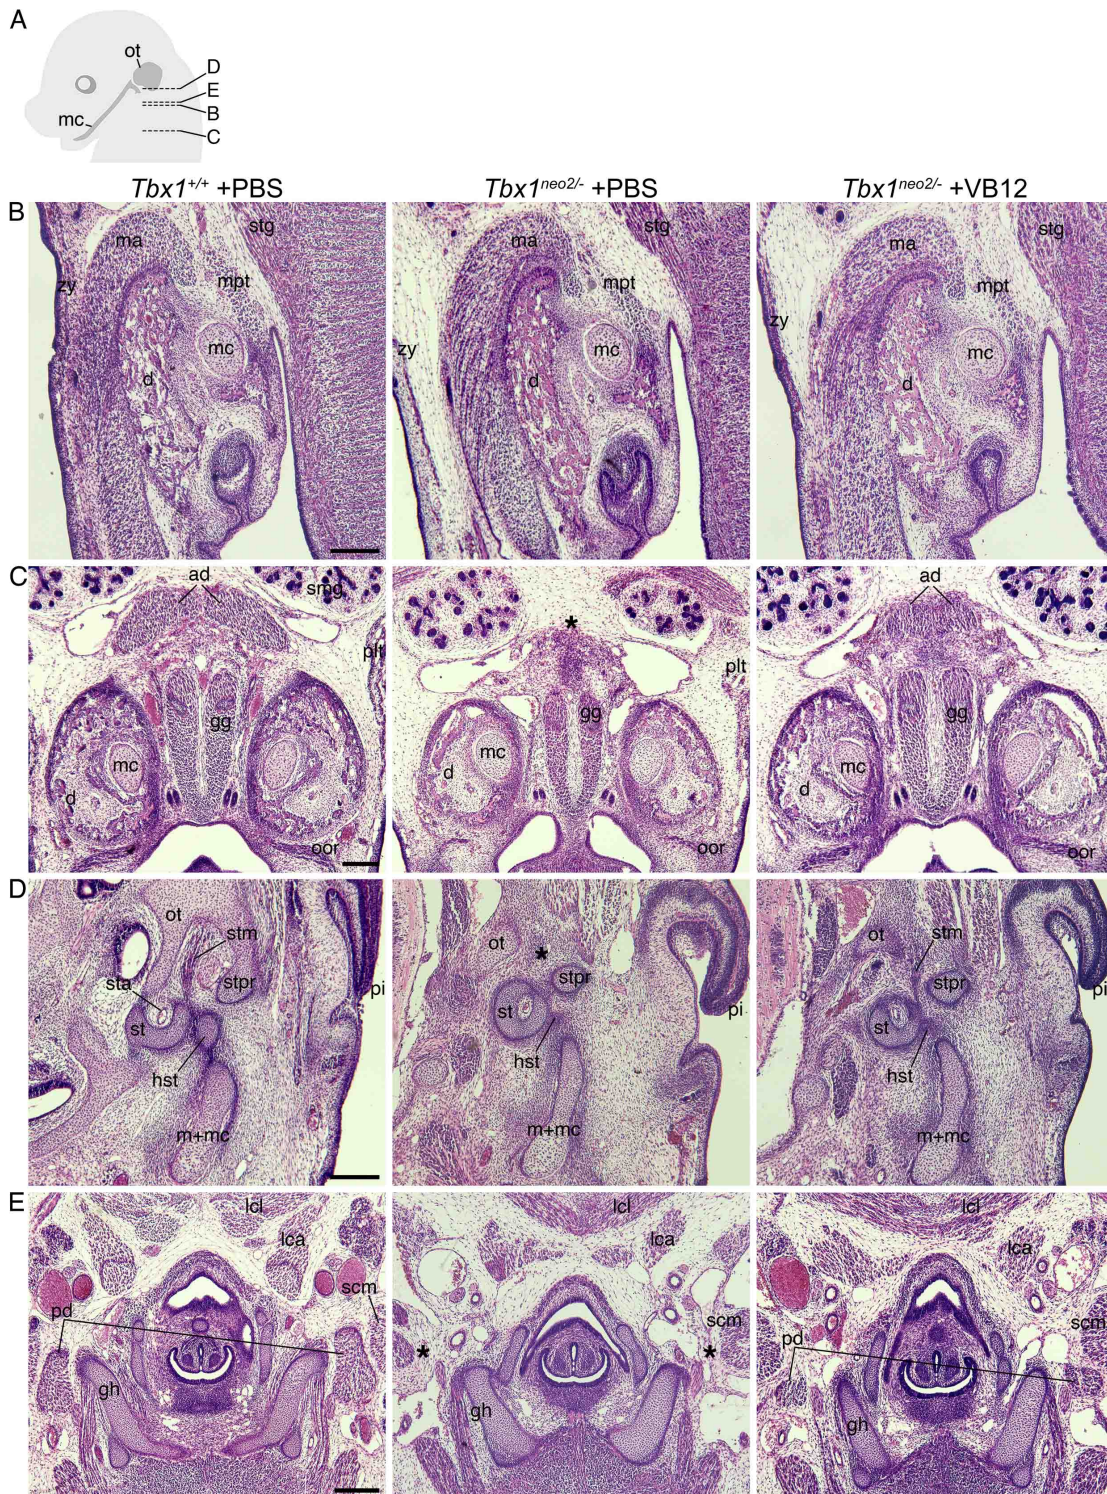

233

234

235

236

237

238

239

240

241

**Figure 2** Vitamin B12 treatment partially rescues the branchiomeric muscle phenotype in *Tbx1*<sup>neo2/-</sup> embryos. Histological sections of *Tbx1*<sup>+/+</sup> and *Tbx1*<sup>neo2/-</sup> embryos at E15.5, stained with hematoxylin and eosin. A) A diagram showing the section levels. B) Middle and C) ventral jaw muscles derived from 1st pharyngeal arch. D) Otic and E) hyoid muscles derived from 2nd pharyngeal arch. The asterisks indicate missing muscles that are rescued by vB12, but not by PBS treatment, in this particular set of embryos (anterior digastric, posterior digastric, and stapedius muscles). For a complete list of results, see Supplementary Table 1.

242           Abbreviations: *ad*, anterior digastric muscle; *d*, dentary; *gg*, genioglossus muscle; *gh*,  
243 greater horn of hyoid bone; *hst*, head of stapes; *lca*, longus capitis muscle; *lcl*, longus coli muscle;  
244 *ma*, masseter muscle; *mc*, Meckel's cartilage; *m+mc*, malleus and Meckel's cartilage; *mpt*, medial  
245 pterygoid muscle; *oor*, orbicularis oris muscle; *ot*, otic capsule; *pd*, posterior digastric muscle; *pi*,  
246 pinna; *plt*, platysma muscle; *scm*, sternocleidomastoid muscle; *smg*, submandibular gland; *st*,  
247 stapes; *sta*, stapedia artery; *stg*, styloglossus muscle; *stm*, stapedius muscle; *stpr*, styloid process;  
248 *zy*, zygomaticus muscle.  
249 Scale bars: 200  $\mu$ m.

250

251 *Identification of rescued genes after B12 treatment in vivo.*

252           In order to evaluate the effect of vB12 treatment on embryo tissue transcription, we  
253 performed RNA-seq on whole E9.5 mouse embryos (21 somite stage) after treatment with  
254 vB12 or vehicle (PBS) during pregnancy (i.p. 20mg/Kg/day at E7.5, E8.5, and E9.5). We  
255 analyzed the results from PBS-treated WT (n=3), PBS-treated *Tbx1*<sup>+/-</sup> (n=3), and vB12-treated  
256 *Tbx1*<sup>+/-</sup> (n=2) embryos, where each embryo was sequenced independently and each dataset  
257 was treated as a biological replicate. Comparing *Tbx1*<sup>+/-</sup> vs *Tbx1*<sup>+/+</sup> embryos, we found a total  
258 of 1409 differentially expressed genes (DEGs) (fold change cut off of > 1.2, and posterior  
259 probability, PP > 0.95) of which 851 (60.4%) up-regulated and 558 (39.6%) were down-  
260 regulated (Fig. 3A and Supplementary Tab. 2). Gene ontology analyses of the 851 up-  
261 regulated genes revealed an enrichment in genes involved in oxidative phosphorylation and  
262 other metabolic processes, while among the 558 down-regulated genes, there was enrichment  
263 of genes involved in morphogenesis and developmental processes (Table 2). Comparing  
264 vB12-treated *Tbx1*<sup>+/-</sup> embryos with PBS-treated *Tbx1*<sup>+/-</sup> embryos, we found a total of 3954  
265 DEGs, of which 1862 (47%) were up-regulated and 2092 (53%) were down-regulated (Fig.  
266 3B and Supplementary Tab. 2). Gene ontology analyses revealed that the up-regulated genes  
267 were enriched for genes involved in RNA processing, while down-regulated genes were  
268 enriched for genes involved in developmental processes (Table 3). Details of the gene  
269 ontology analyses are shown in Supplementary Table 3.  
270

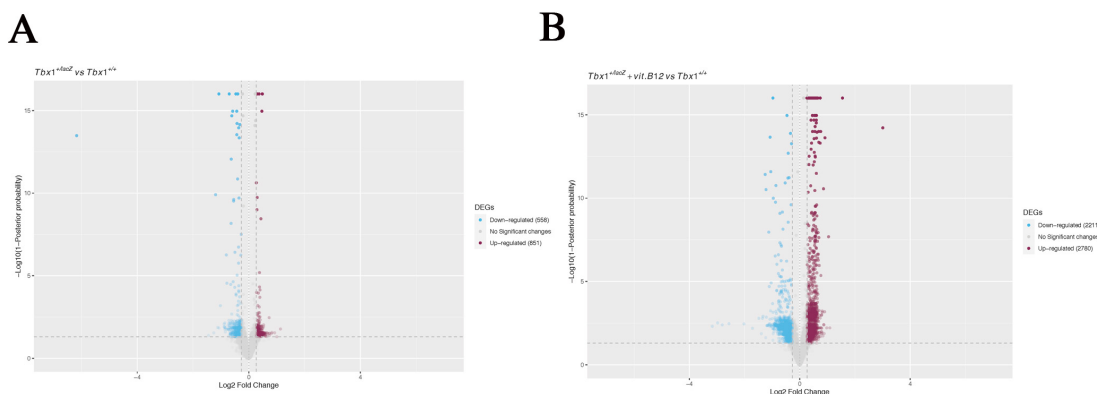

271

272 **Figure 3** *Tbx1* gene haploinsufficiency alters the expression of 1409 genes, while Vitamin B12  
273 treatment in heterozygous background induces dysregulation of 3954 genes. A) *Volcano plot*  
274 *of significantly up regulated or down regulated genes in Tbx1*<sup>+/-</sup> *whole embryos compared to*  
275 *Tbx1*<sup>+/+</sup> *embryos. Blue dots represent down regulated genes, red dots represent up regulated*



276 *genes. B) Volcano plot of significantly up regulated or down regulated genes in Tbx1<sup>+/-</sup> + vB12*  
 277 *embryos compared to controls. Blue dots represent down regulated genes, red dots represents up*  
 278 *regulated genes.*

279

280 **Table 2** *Gene ontology analysis of down regulated and up regulated genes of DEGs from*  
 281 *comparison Tbx1<sup>+/-</sup> vs Tbx1<sup>+/+</sup>*

| 851 Up regulated genes                                 |            |                  | 558 Down regulated genes                      |            |                  |
|--------------------------------------------------------|------------|------------------|-----------------------------------------------|------------|------------------|
| term_name                                              | term_id    | Adjusted_p_value | term_name                                     | term_id    | adjusted_p_value |
| peptide biosynthetic process                           | GO:0043043 | 3,46E-20         | anatomical structure morphogenesis            | GO:0009653 | 8,51E-14         |
| peptide metabolic process                              | GO:0006518 | 8,08E-20         | cellular component organization               | GO:0016043 | 1,58E-11         |
| oxidative phosphorylation                              | GO:0006119 | 4,84E-16         | system development                            | GO:0048731 | 5,65E-11         |
| amide biosynthetic process                             | GO:0043604 | 6,06E-16         | developmental process                         | GO:0032502 | 8,41E-11         |
| mitochondrial respiratory chain complex assembly       | GO:0033108 | 7,71E-15         | multicellular organism development            | GO:0007275 | 8,68E-11         |
| electron transport chain                               | GO:0022900 | 1,04E-13         | anatomical structure development              | GO:0048856 | 9,92E-11         |
| mitochondrial respiratory chain complex I assembly     | GO:0032981 | 5,89E-13         | cell development                              | GO:0048468 | 1,18E-10         |
| NADH dehydrogenase complex assembly                    | GO:0010257 | 5,89E-13         | heart development                             | GO:0007507 | 2,97E-10         |
| cellular amide metabolic process                       | GO:0043603 | 1,15E-12         | cellular component organization or biogenesis | GO:0071840 | 3,08E-10         |
| ATP synthesis coupled electron transport               | GO:0042773 | 1,65E-11         | nervous system development                    | GO:0007399 | 1,00E-09         |
| mitochondrial ATP synthesis coupled electron transport | GO:0042775 | 3,52E-11         | embryo development                            | GO:0009790 | 2,40E-09         |

282

283

284 **Table 3** *Gene ontology analysis of down regulated and up regulated genes of DEGs from*  
 285 *comparison Tbx1<sup>+/-</sup> + B12 vs Tbx1<sup>+/-</sup> +PBS*

| 2780 Up regulated genes                      |            |                  | 2211 Down regulated genes                        |            |                  |
|----------------------------------------------|------------|------------------|--------------------------------------------------|------------|------------------|
| term_name                                    | term_id    | adjusted_p_value | term_name                                        | term_id    | Adjusted_p_value |
| ribonucleoprotein complex biogenesis         | GO:0022613 | 1,12E-23         | nervous system development                       | GO:0007399 | 7,91E-56         |
| ribosome biogenesis                          | GO:0042254 | 1,53E-23         | multicellular organism development               | GO:0007275 | 8,63E-47         |
| cellular nitrogen compound metabolic process | GO:0034641 | 5,27E-20         | system development                               | GO:0048731 | 1,46E-46         |
| RNA processing                               | GO:0006396 | 5,56E-19         | regulation of transcription by RNA polymerase II | GO:0006357 | 2,77E-42         |
| ncRNA processing                             | GO:0034470 | 5,74E-19         | transcription by RNA polymerase II               | GO:0006366 | 1,22E-40         |
| ncRNA metabolic process                      | GO:0034660 | 1,88E-17         | neurogenesis                                     | GO:0022008 | 1,92E-39         |
| rRNA processing                              | GO:0006364 | 3,72E-15         | regulation of cellular process                   | GO:0050794 | 2,90E-39         |
| rRNA metabolic process                       | GO:0016072 | 3,95E-14         | cellular developmental process                   | GO:0048869 | 1,57E-38         |
| ribosomal large subunit biogenesis           | GO:0042273 | 9,62E-13         | anatomical structure development                 | GO:0048856 | 1,93E-38         |
| heterocycle metabolic process                | GO:0046483 | 1,05E-11         | cell differentiation                             | GO:0030154 | 2,21E-38         |
| cellular metabolic process                   | GO:0044237 | 1,73E-11         | anatomical structure morphogenesis               | GO:0009653 | 1,66E-37         |
| cellular aromatic compound metabolic process | GO:0006725 | 6,17E-11         | developmental process                            | GO:0032502 | 2,02E-37         |

286

287

288 The intersection of the two groups of DEGs identified 468 shared genes (Fig. 4A), which is  
 289 significantly higher than that expected by chance ( $P=1.4 \times 10^{-7}$ , hypergeometric test). Of these,  
 290 344 changed their expression in opposite directions in the two groups, i.e. the mutation  
 291 changed expression in one direction while vB12 treatment rebalanced it (Fig. 4B, genes listed  
 292 in Supplementary Tab. 2); we define these genes as rescued by vB12. In the left column of the

293 heat map shown in Fig. 4B are represented genes dysregulated by the mutation; the right  
 294 column shows their expression after vB12 treatment (compared to WT). Thus, the dark color  
 295 in the right column indicates genes that were expressed at or near WT level after treatment.  
 296 Of these 344 genes, 85 (24.7%, shown in green) were down-regulated, and 259 (75.3%,  
 297 shown in red) were up-regulated relative to WT (Fig. 4B, left column).

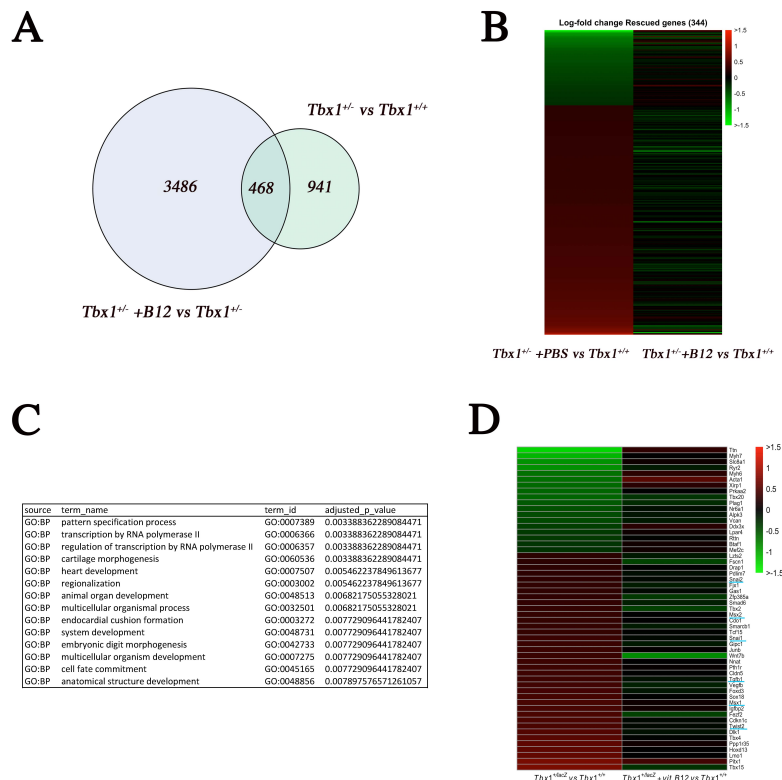

298  
 299  
 300 **Figure 4** Vitamin B12 rescues the expression of 344 genes involved in gene regulation and  
 301 heart development. *A)* Venn diagram plot representing the intersection of two groups of  
 302 differentially expressed genes (*Tbx1*<sup>+/-</sup> vs. *Tbx1*<sup>+/+</sup>, and *Tbx1*<sup>+/-</sup> +vB12 vs. *Tbx1*<sup>+/-</sup> +PBS). *B)* Heat  
 303 maps of rescued genes in *Tbx1*<sup>+/-</sup> embryos (treated with vB12 or PBS) based on their fold change  
 304 relative to WT. *C)* gene ontology analysis by the gProfiler tool. *D)* Heat map of 55 genes selected  
 305 because known to be expressed in the pharyngeal apparatus.

306  
 307 We then applied a hypergeometric test to ask whether rescue of gene expression imbalances  
 308 by vB12 could have occurred by chance, given the high number of genes affected by the  
 309 treatment. Interestingly, we found that the rescue of the 259 up-regulated genes was  
 310 extremely significant ( $P < 10^{-10}$ ), while the rescue of the 85 downregulated genes was  
 311 borderline with a chance event ( $P = 0.052$ ). In addition, the number of genes that were further  
 312 dysregulated by vB12 ( $468 - 344 = 124$ ), which were almost equally distributed among up- and  
 313 down-regulated (59 and 65, respectively) were not significantly different to that expected  
 314 from a chance event. Thus, the most significant rescue effect of vB12 was on genes that were  
 315 up-regulated by *Tbx1* heterozygosity and down regulated by vB12 treatment.

316 Gene ontology of the 344 rescued genes showed enrichment of Heart Development  
 317 genes ( $P = 0.005$ ) and Transcription Regulator genes ( $P = 0.003$ ) (Supplementary Table 3).

318

319 *SLUG identifies a mesodermal population partially overlapping with but distinct from the*  
320 *TBX1+, ISL1+, and Mef2c-AHF-Cre+ populations.*

321 Among the rescued genes, we identified 55 genes known to be expressed in the  
322 cardiopharyngeal mesoderm (CPM), or its derivatives, and to a lesser extent, in other tissues  
323 of the PhAp (Fig. 4D and Supplementary Tab. 2). Among these, we noted a set of genes known  
324 to be involved in the Tgf $\beta$ 1 pathway. Specifically, *Snai1*, *Snai2*, *Twist2*, *Msx1*, and *Tgfb1* were  
325 all up-regulated in *Tbx1*<sup>+/-</sup> mutant embryos and down regulated by vB12 treatment (blue  
326 underlined in Fig. 4D). We selected *Snai2*, encoding a transcriptional repressor also known as  
327 SLUG, which has not been previously associated with TBX1 biology. We performed  
328 immunofluorescence (IF) with an anti-SLUG antibody to determine its expression relative to  
329 markers of the CPM in E9.5 WT embryos. The anti-SLUG and anti-TBX1 antibodies are raised  
330 in the same species, therefore we used them in sequence on the same sections; similar results  
331 were obtained by inverting the order of the antibodies. As shown in Fig. 5A-B, at all section  
332 levels considered, there was a very similar distribution of the two proteins, with notable  
333 exceptions. Specifically, in the 1st PA, both proteins were present in the core mesoderm, but  
334 SLUG+ cells were fewer in the core and there were more of them scattered in the body of the  
335 PA (arrowhead in B); TBX1+ cells were more evident in the proximal region of the arch (Fig.  
336 5A-B). In the 2nd PA, the SLUG domain extended more distally towards the OFT, compared to  
337 the TBX1 domain (Fig. 5A'-B'). At the other two levels analysed, namely, posterior to the OFT  
338 (Fig. 5A''-B'') and immediately anterior to the inflow tract (IFT) (Fig. 5A'''-B'''), the  
339 distribution of the two proteins was very similar in the lateral aspects of the dorsal  
340 pericardial and splanchnic mesoderm.

341 Next, we compared the expression of SLUG to that of the Mef2c-AHF enhancer using an  
342 anti-CRE antibody on sections of Mef2c-AHF-Cre embryos (Verzi et al., 2005). Also in this  
343 case, the expression patterns of the two proteins were very similar (Fig. 5C-D), except for two  
344 substantial differences; in the 2nd PA, Mef2c-AHF-Cre was expressed more distally towards  
345 the OFT, including the myocardial layer of the OFT, (Fig. 5C'-D'), more extensively in the  
346 dorsal pericardial wall (Fig. 5C''), and more extensively in the splanchnic mesoderm of the  
347 posterior region of the embryonic pharynx (Fig. 5C'''-D''').

348 We then compared SLUG expression to that of ISL1, which is expressed throughout the  
349 CPM (Fig. 6). The two markers had a very similar, mostly overlapping expression in the 1st  
350 pharyngeal arch (Fig. 6A-B) of WT embryos. In the 2nd arch, SLUG was more highly expressed  
351 in the distal portion of the arch, where it overlapped with ISL1, whereas in the proximal  
352 portion, there was a high expression of ISL1 but not of SLUG. Double labeled cells were  
353 detected in a medio-lateral region of the dorsal pericardial wall, where ISL1 expression was  
354 more extensive (Fig. 6A''-B''); in addition, the more posterior expression of ISL1 in the  
355 splanchnic mesoderm (arrow in Fig. 6B'') is similar to the TBX1 expression domain (Fig. 6C-  
356 D).

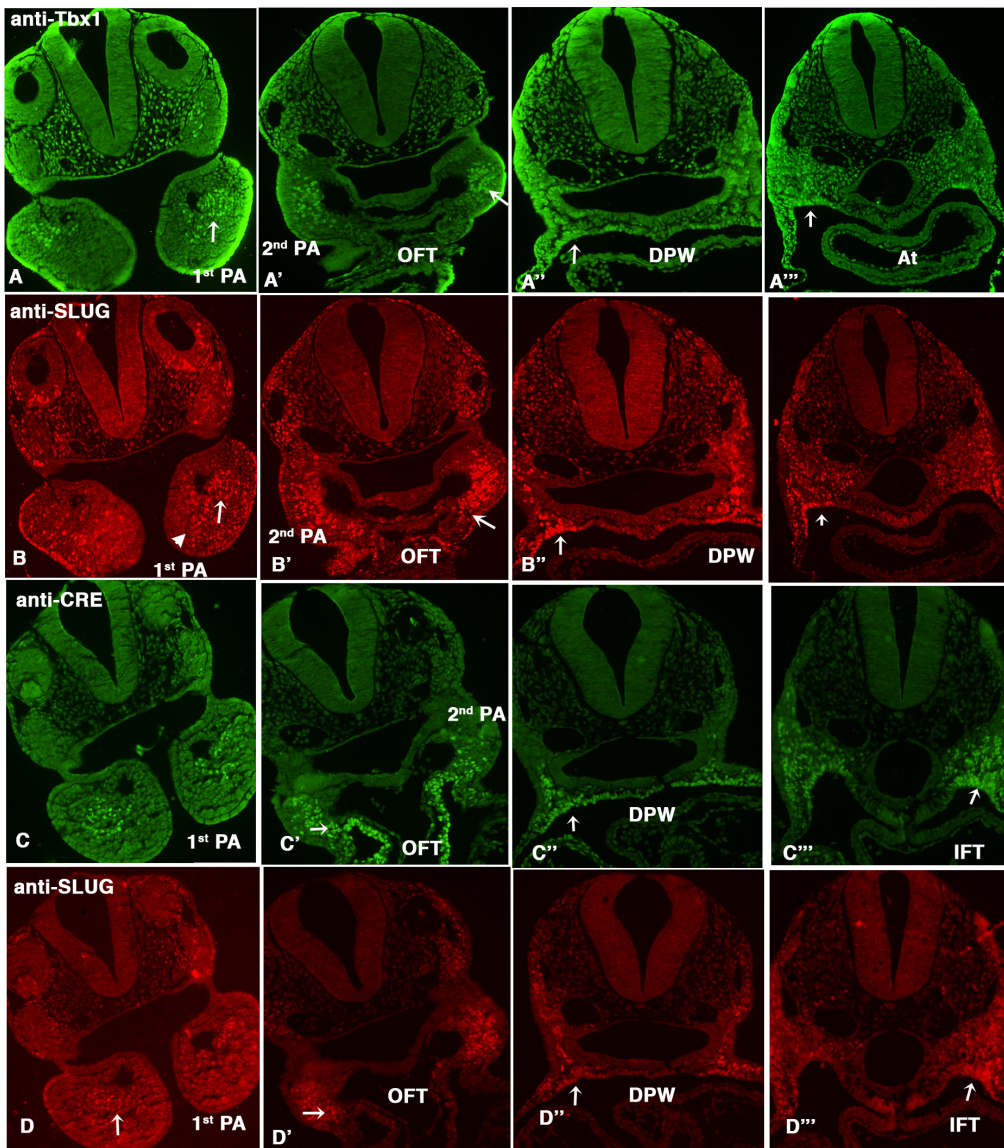

357  
358

359 **Figure 5** SLUG is expressed in the mesoderm and partially overlaps with TBX1 and Mef2c-  
360 AHF expression. *Immunofluorescence on transverse sections of E9.5 embryos. A and B,*  
361 *comparison of TBX1 and SLUG expression A) anti TBX1 antibody, B) anti SLUG antibody on the*  
362 *same sections; C and D, comparison of the expression patterns of Cre driven by Mef2c-AHF-Cre,*  
363 *and SLUG. C) anti-Cre and D) anti SLUG. For both comparisons, we have used sequential staining*  
364 *because the antibodies were raised in the same species. The arrows indicate the expression of*  
365 *Tbx1 or CRE or SLUG in core mesoderm region in 1<sup>st</sup> PA, in the distal mesoderm in 2<sup>nd</sup> PA, in*  
366 *dorsal pericardial wall and in second heart field.*

367 *PA: Pharyngeal arch; DPW: dorsal pericardial wall; SHF: Second heart field, IFT: inflow tract;*  
368 *OFT: outflow tract.*

369 *Scale bar: 100  $\mu$ m*

370  
371  
372

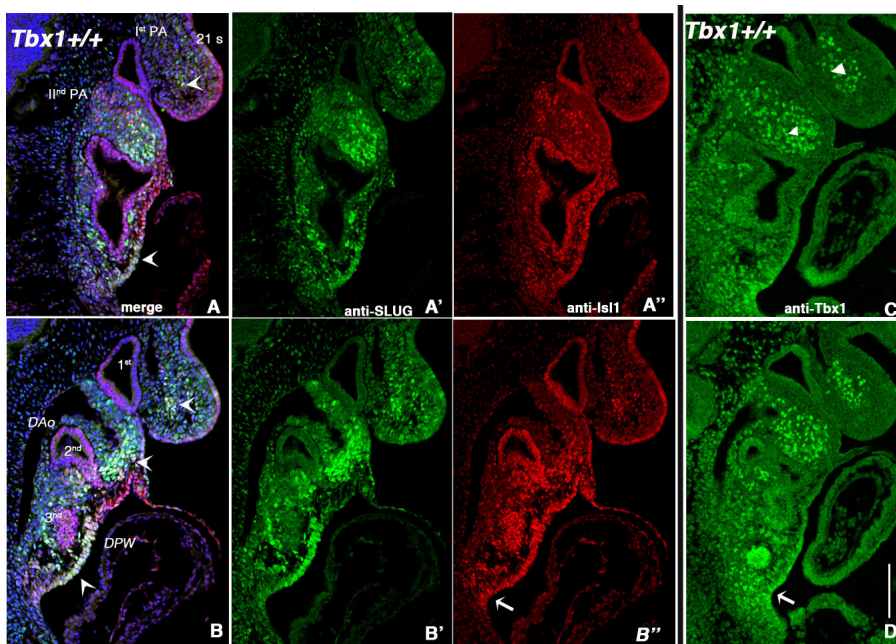

373  
 374 **Figure 6** SLUG and ISL1 have a similar pattern of expression with exceptions in the proximal  
 375 2nd PA and pSHF. (A-B) Double immunofluorescence with anti-SLUG and anti-ISL1 on sagittal  
 376 sections of WT E9.5 embryos. Two representative images from lateral (A) to medial (B). A'-B'  
 377 anti-SLUG; A''-B'') anti-ISL1. Arrows indicate regions where ISL1 expression is more extensive  
 378 than SLUG (compare A' with A'', and B' and B''. In C) and D) are shown similar sections but  
 379 immunostained with an anti-TBX1 antibody. Note a similar expression of TBX1 and ISL1 at this  
 380 level (arrows). Note also the difference in the expression in the 1st PA (arrowhead) compared to  
 381 both ISL1 and SLUG. PA: pharyngeal arch; DPW: dorsal pericardial wall; DAo: dorsal aorta. Scale  
 382 bar: 200  $\mu$ m  
 383  
 384

385 Because of the scattered expression of SLUG in the body of the 1st PA, which is heavily  
 386 populated by NCCs, we co-stained E9.5 embryos (WT) with TFAP2A, which labels migrating  
 387 NCCs at this stage (as well as ectodermal cells). With very few exceptions, we did not observe  
 388 double labeled cells in the entire embryo (examples in Fig. 7A, C, E), but we observed  
 389 extensive intermingling of SLUG+ and TFAP2A+ cells. Thus, SLUG is expressed in mesodermal  
 390 cells, mainly in the distal 2nd PA, in the medio-lateral dorsal pericardial wall, in the posterior  
 391 lateral splanchnic mesoderm and, to a minor extent, in the 1st PA.  
 392

393 *Tbx1* mutants have lineage regionalization abnormalities.

394 We next investigated whether *Tbx1* loss of function affected the SLUG+ population. We  
 395 first examined this population in comparison to NCCs (TFAP2+; TBX1-negative). At the level  
 396 of the 1st PA, we found a striking pattern in which SLUG+ cells in *Tbx1*<sup>-/-</sup> embryos were tightly  
 397 grouped in the core mesoderm forming a large area surrounded by, but not mixed with  
 398 TFAP2A+ cells (Fig. 7B), while in WT embryos the two cell types were intermingled (Fig. 7A).  
 399 A similar pattern was evident in the head mesoderm/proximal 1<sup>st</sup> PA (Fig. 7A-B, arrows). At  
 400 the level of the 2<sup>nd</sup> PA, which is severely hypoplastic in *Tbx1*<sup>-/-</sup> embryos, the mixing of the two  
 401 populations was substantially reduced, although here the TFAP2+ population appeared  
 402 smaller than in WT (Fig. 7C-D, arrows). More posteriorly (caudal to the OFT) this segregation

403 phenotype was not apparent, of note is a relative expansion of the SLUG+ population at this  
404 level in the splanchnic mesoderm of the mutant embryo (Fig. 7E-F, arrows).

405  
406

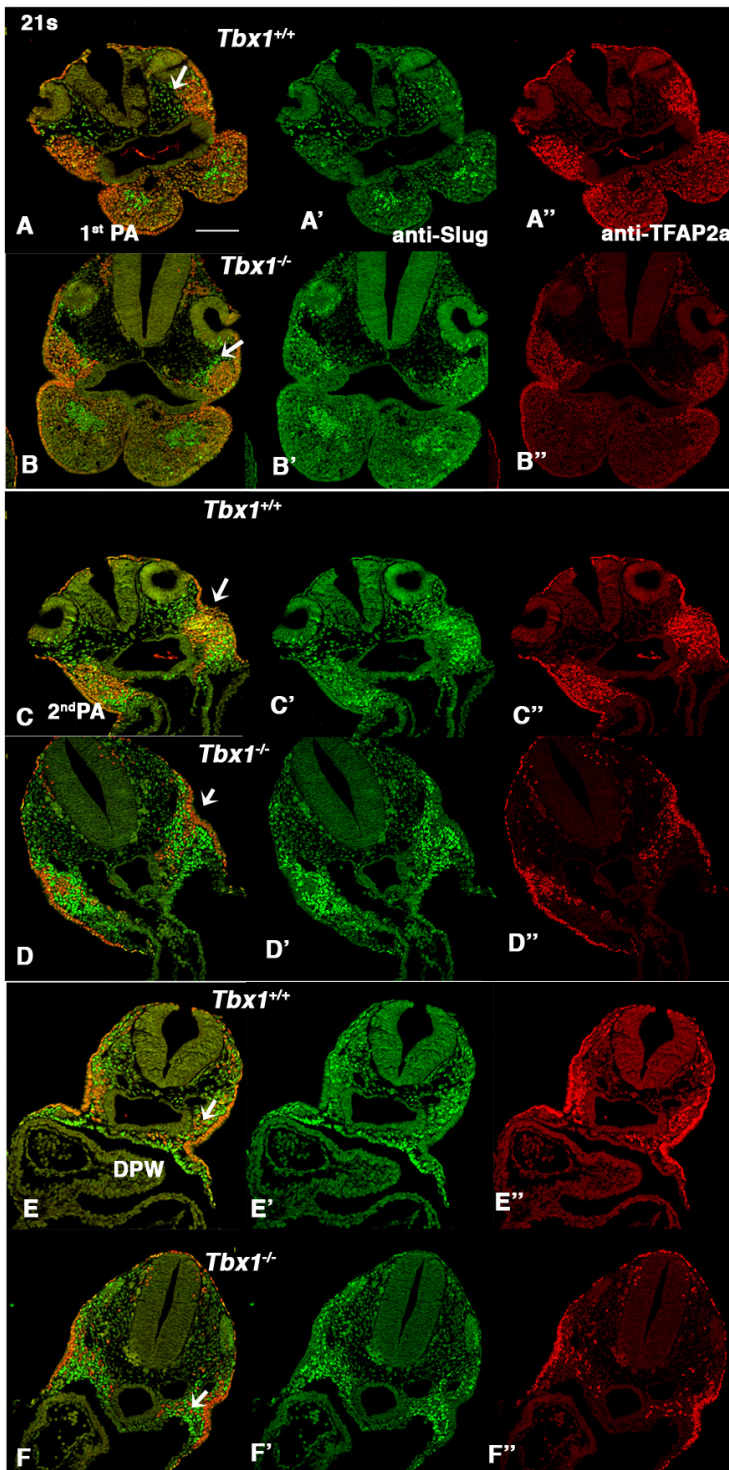

407  
408 **Figure 7** TFAP2A and SLUG highlights regionalization defects in *Tbx1*<sup>-/-</sup> embryos.  
409 *Representative images of double immunofluorescence anti TFAP2 (red) and SLUG (green)*  
410 *transverse sections of *Tbx1*<sup>+/+</sup> (A,C,E) and *Tbx1*<sup>-/-</sup> (B,D,F) E9.5 embryos at the level of the 1st PA*  
411 *(A-B), 2nd PA/OFT (C-D), and dorsal pericardial wall (DWP) between the OFT and IFT (E-F). In*  
412 *general, there is minimal or no overlap between the two markers. In A-B note the different*

413 *relative distribution of SLUG+ and TFAP2A+ cells in the 1st PA (arrows). In C-D, cells of the two*  
414 *lineages are intermingled in the WT 2nd PA but segregated in the mutant (arrows); in E-F, note*  
415 *the expansion of SLUG expression in the mutant (arrows). Scale bar: 200  $\mu$ m*

416

417 *Tbx1 mutants have lineage regionalization abnormalities.*

418 We next investigated whether *Tbx1* loss of function affected the SLUG+ population. We  
419 first examined this population in comparison to NCCs (TFAP2+; TBX1-negative). At the level  
420 of the 1st PA, we found a striking pattern in which SLUG+ cells in *Tbx1*<sup>-/-</sup> embryos were tightly  
421 grouped in the core mesoderm forming a large area surrounded by, but not mixed with  
422 TFAP2A+ cells (Fig. 7B), while in WT embryos the two cell types were intermingled (Fig. 7A).  
423 A similar pattern was evident in the head mesoderm/proximal 1<sup>st</sup> PA (Fig. 7A-B, arrows). At  
424 the level of the 2<sup>nd</sup> PA, which is severely hypoplastic in *Tbx1*<sup>-/-</sup> embryos, the mixing of the two  
425 populations was substantially reduced, although here the TFAP2+ population appeared  
426 smaller than in WT (Fig. 7C-D, arrows). More posteriorly (caudal to the OFT) this segregation  
427 phenotype was not apparent, of note is a relative expansion of the SLUG+ population at this  
428 level in the splanchnic mesoderm of the mutant embryo (Fig. 7E-F, arrows).

429 We next examined the distribution of SLUG+ cells compared to ISL1+ cells in *Tbx1*<sup>-/-</sup>  
430 embryos. In the 1st PA of *Tbx1*<sup>-/-</sup> embryos, and in contrast to WT embryos, we observed a  
431 large, well defined cluster of SLUG+ cells that were mostly ISL1+ in the core mesoderm and  
432 appeared to extend posteriorly, as if it resulted from merging with the core of the 2nd PA,  
433 which is severely hypoplastic in these mutants (arrow in Fig. 8A-B). In a more medial sagittal  
434 plane, the aggregate is also clearly visible (Fig. 8C-D).

435

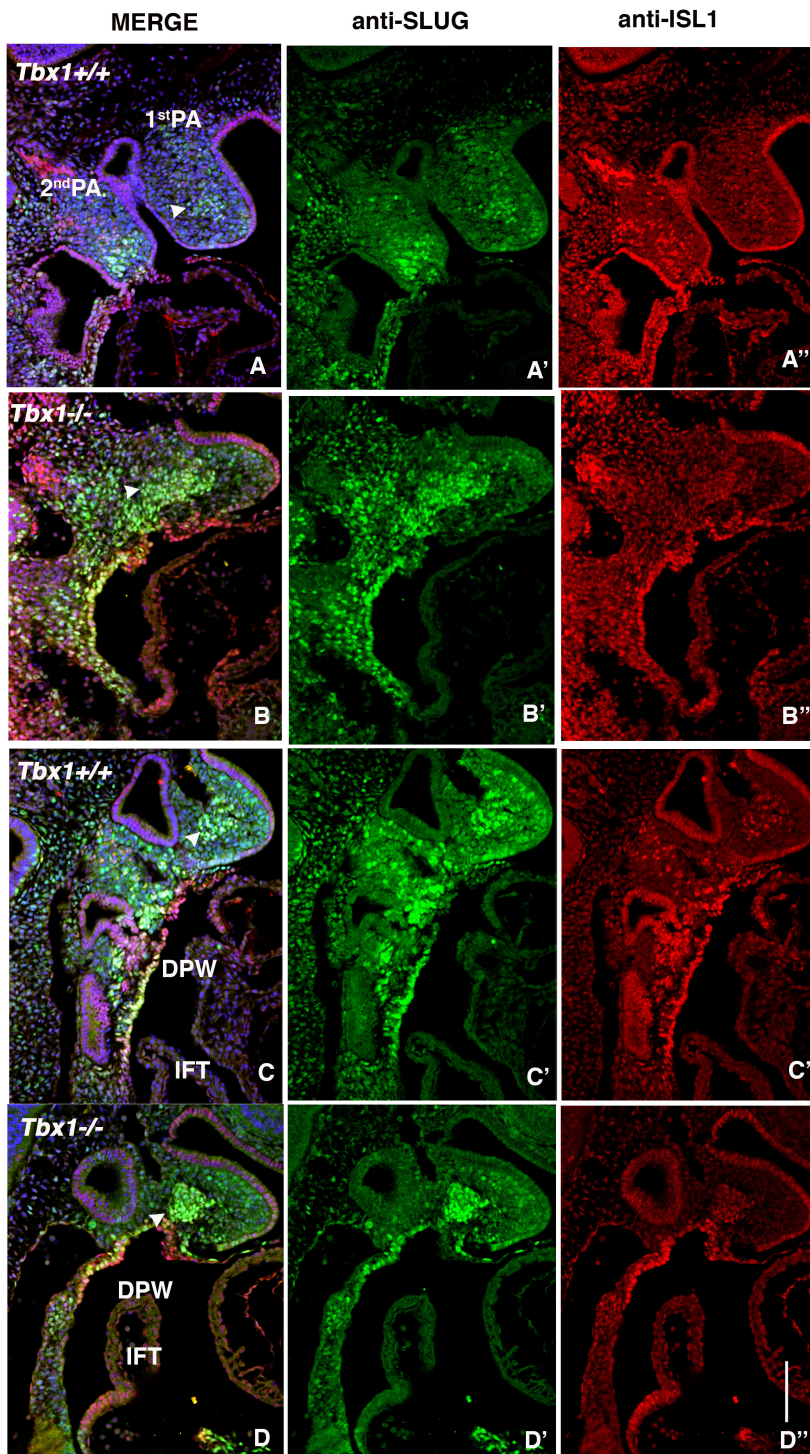

436

437

438

439

440

441

442

443

444

445

**Figure 8** The core mesoderm of the 1st PA of *Tbx1*<sup>-/-</sup> embryos is populated by SLUG<sup>+</sup>;ISL1<sup>+</sup> cells. Double immunofluorescence using anti-SLUG (green) and anti-ISL1 (red) on medial sagittal sections (A,B) and on transverse sections (C,D) of 1st PA from *Tbx1*<sup>+/+</sup> (A,C) and *Tbx1*<sup>-/-</sup> (B,D) embryos. Note the co-localization of ISL1 and SLUG in the core mesoderm of 1st PA in *Tbx1*<sup>-/-</sup>. In the WT, this is much less evident (arrow in 1st PA). In addition, SLUG expression is extended in the splanchnic mesoderm of the *Tbx1*<sup>-/-</sup> embryo (lower arrow in B, compare A'' and B''). INF: Venous pole. Scale bar: 100  $\mu$ m

We next tested whether cells of the *Tbx1* genetic lineage are mislocalized relative to SLUG<sup>+</sup> cells, in the absence of *Tbx1* function. To this end, we performed anti-SLUG and anti-



446 GFP IF on *Tbx1<sup>cre/-</sup>;R26R<sup>mT-mG</sup>* (*Tbx1* null) and *Tbx1<sup>cre/+</sup>;R26R<sup>mT-mG</sup>* (heterozygous, control) E9.5  
447 embryos (*Tbx1<sup>Cre</sup>* is a null allele). Results showed that in control embryos, GFP+ cells (shown  
448 in red in Fig. 9A-B) were more prominent in the proximal and lateral aspects of the 1st PA  
449 relative to SLUG+ cells, with only a limited overlap. Moreover, the relationship between the  
450 markers was largely conserved in *Tbx1* null embryos (Fig. 9A-B), indicating that the SLUG+  
451 aggregate in the 1st PA is mostly made of cells that did not activate *Tbx1* gene transcription.  
452

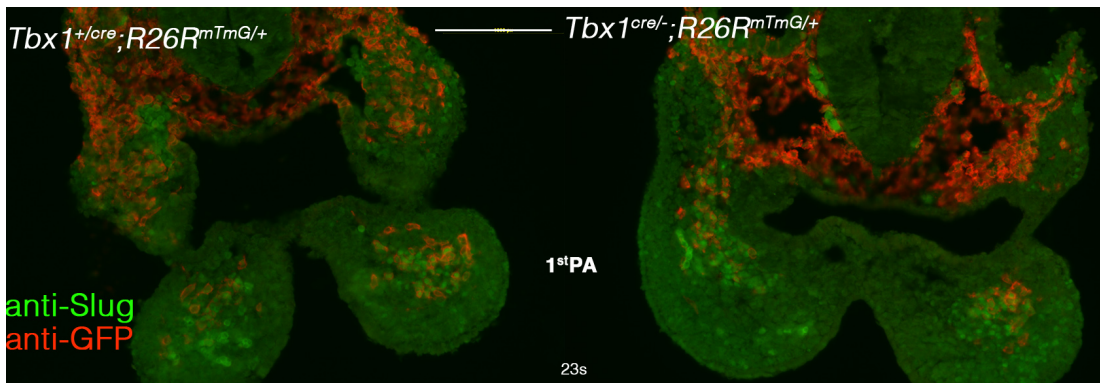

453  
454 **Figure 9** The positional relation between TBX1+ and SLUG+ cells is maintained in *Tbx1* null  
455 embryos. Immunofluorescence using anti-GFP (red) and anti-SLUG (green) on transversal  
456 sections of *Tbx1<sup>Cre/+</sup>;R26R<sup>mTmG</sup>* (functionally heterozygous, A) and *Tbx1<sup>Cre/-</sup>;R26R<sup>mTmG</sup>* (null  
457 mutant, B) E9.5 embryos. Note that *Tbx1*-activating cells and their descendants (in red) localize  
458 prevalently in laterally in the core mesoderm and in the proximal region of the PA, in both cases.  
459 Scale bar: 100  $\mu$ m  
460

461 To understand how the aggregation of SLUG+ cells in the 1st PA of *Tbx1<sup>-/-</sup>* mutants  
462 arises, we examined earlier developmental stages: 11, 15, and 20 somites (st), immunostained  
463 with anti-SLUG and anti-ISL1 antibodies. In the WT embryo, at 11st the 1st PA is mostly  
464 populated by compacted mesoderm (ISL1+ and SLUG+) and a very limited non-mesodermal  
465 mesenchymal population (Supplementary Fig. 4A, A'). At this stage, the NCCs have not  
466 populated the arch in a substantial manner (Grenier et al., 2009). As NCCs populate the arch at  
467 15st, they mostly surround the mesodermal core but a subpopulation invades the core,  
468 resulting in the dispersion of SLUG+ and ISL1+ cells within the arch mesenchyme  
469 (Supplementary Fig. 4B, B'). This process of dispersion continues at the 20st stage  
470 (Supplementary Fig. 4C, C'). In the *Tbx1<sup>-/-</sup>* embryo, this process of dispersion does not occur at  
471 any stage (Supplementary Fig. 4D-F'), and as a result the SLUG+ and ISL1+ cells remain  
472 compacted. These observations suggest that in *Tbx1* mutants, NCCs fail to penetrate the pre-  
473 existing mesodermal core so that the two lineages remain segregated.

474 We next asked whether the segregation of SLUG+ cells may be explained by differential  
475 cell-cell adhesion mediated by cadherins. CDH2 (also known as N-Cadherin) is expressed in  
476 many mesodermal tissues and is involved in collective cell migration (review in (Alimperti  
477 and Andreadis, 2015)). We performed immunofluorescence with an anti-CDH2 antibody along  
478 with an anti-SLUG antibody and we found very low expression in the 1st PA of WT E9.5  
479 embryos and higher expression in the 11nd PA (Fig. 10B). However, in *Tbx1<sup>-/-</sup>* embryos, the  
480 compacted SLUG+ mesodermal core of the 1st PA was clearly CDH2+, well above the level of  
481 expression in the surrounding mesenchyme (Fig. 10C)

482

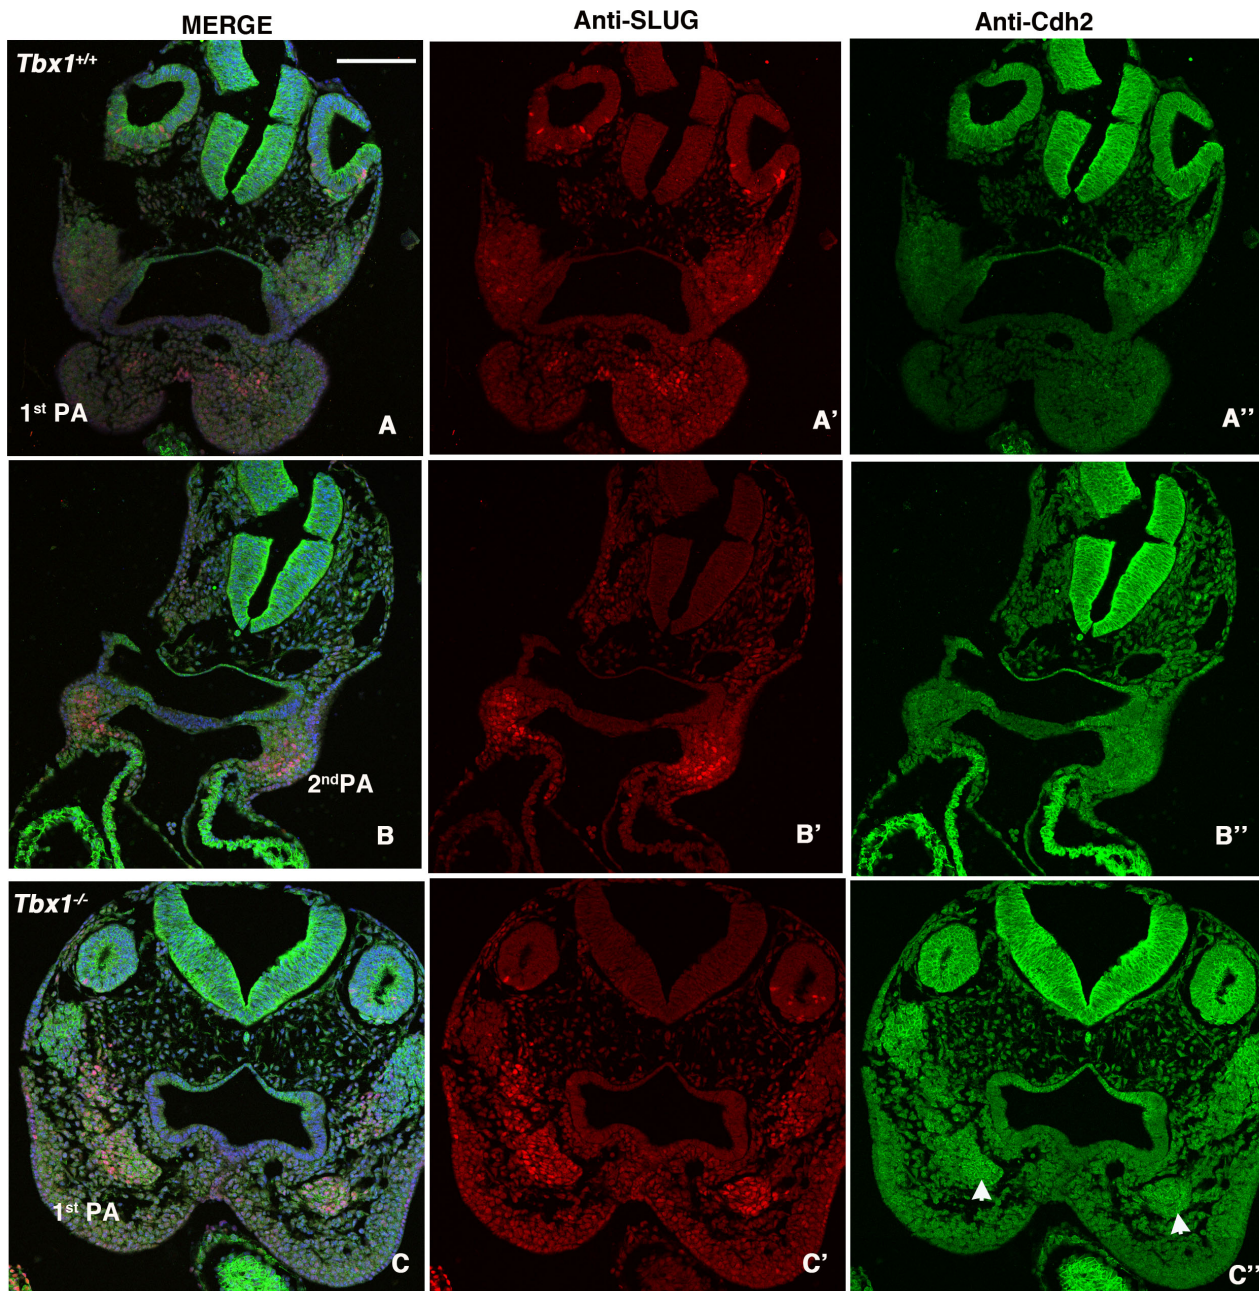

483

484

485

486

487

488

489

490

491

492

493

494

495

**Figure 10** CDH2 (N-cadherin) is up-regulated in the 1st pharyngeal arch of *Tbx1*<sup>-/-</sup> E9.5 embryos. Immunofluorescence of transverse sections of E9.5 embryos with the genotype indicated, double labelled with anti-SLUG (red) and anti CDH2 (green) antibodies. A-A'') transverse section at the level of the 1st PA, and B-B'') at the level of the 2nd PA and OFT of a WT embryo). C-C'') transverse section of a *Tbx1*<sup>-/-</sup> embryo at the level of the 1st PA, note the up regulation of CDH2 on the SLUG+ aggregate at the core of the arch (arrows). Scale bar: 25  $\mu$ m

In summary, our expression analysis indicates that TBX1 has cell autonomous and, perhaps more extensive non-cell autonomous functions in regulating the regionalization of cell lineages that are critical for the development of the PhAp.

*SLUG* identifies a novel haploinsufficiency phenotype rescued by *vB12*.

496 The results described above were obtained in *Tbx1*<sup>-/-</sup> embryos, which exhibit  
497 significant anatomical anomalies, thus raising the question of whether some of the  
498 regionalization differences may be due to anatomical constraints. Therefore, we tested  
499 heterozygous mutants, which have no gross anatomical abnormalities (with the exception of  
500 hypoplasia of the 4th pharyngeal arch artery and parathyroids). As noted above, in the 1st PA  
501 of E9.5 WT embryos SLUG is expressed in a small number of cells of the core mesoderm and in  
502 scattered cells of the body of the arch (Fig. 11A). In *Tbx1*<sup>+/-</sup> embryos, SLUG<sup>+</sup> cells were  
503 grouped in the core mesoderm (Fig 11A', additional examples shown in Supplementary Fig.  
504 5). A similar result was obtained using *Mef2c-AHF-Cre*-driven deletion of *Tbx1* in  
505 *Tbx1*<sup>lox/+</sup>;*Mef2c-AHF-Cre* embryos (Supplementary Fig. 6), indicating that this anomaly is  
506 dependent upon *Tbx1* haploinsufficiency in the mesoderm. This phenotype is reminiscent of  
507 but less severe than that noted in *Tbx1*<sup>-/-</sup> embryos (compare with Fig. 7A-B and Fig. 8C-D).  
508 Interestingly, vB12 treatment rescued this aggregation phenotype, re-establishing a cell  
509 distribution that was similar to the WT pattern (Fig. 11A'') in three independent experiments.  
510 Thus, even a 50% reduction of gene dosage is sufficient to generate defects in lineage  
511 regionalization, at least in the 1st PA, suggesting that these are unlikely to be explained by  
512 anatomical changes.  
513

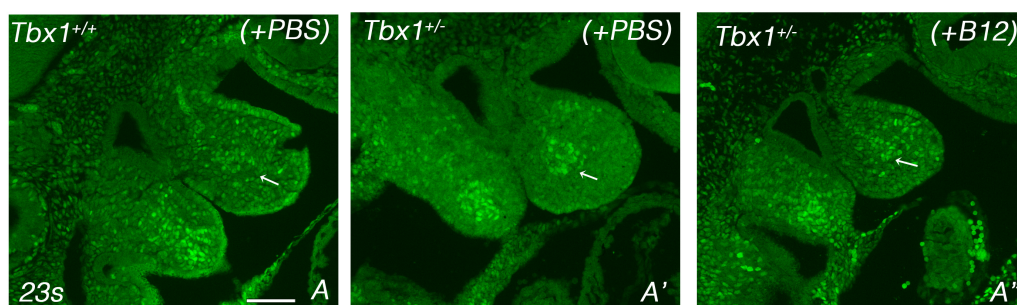

514  
515 **Figure 11** *Tbx1* gene haploinsufficiency causes SLUG<sup>+</sup> cell condensation in the 1st PA rescued  
516 by vitamin B12. Images of immunofluorescence with an anti-SLUG antibody on WT+PBS (A),  
517 *Tbx1*<sup>+/-</sup> +PBS (A'), and *Tbx1*<sup>+/-</sup> +Vit. B12 (A'') E9.5 embryos. Medial-lateral sagittal sections. A  
518 cluster of SLUG<sup>+</sup> condensed cells in the core mesoderm is noticeable in A', while in A'' cells are  
519 more disperse, more similar to the WT pattern. Additional examples of the condensation  
520 phenotype are shown in Supplementary Fig. 5. Scale bar: 100 μm  
521

## 522 DISCUSSION

523 Gene haploinsufficiency is a frequent cause of birth defects, and post-natal morbidity.  
524 Counter-balancing haploinsufficiency is possible but it is challenging in the clinical setting and  
525 may lack sufficient precision to rescue the full spectrum of phenotypic changes.  
526 Pharmacological rescue would be particularly useful in the clinics if it could be precisely  
527 targeted.

528 High doses of vB12 can partially rescue the 4th pharyngeal arch artery phenotype  
529 associated with *Tbx1* gene haploinsufficiency (Lania et al., 2016); in this study we tested  
530 additional phenotypic recoveries by crossing a hypomorphic allele, which combined with a  
531 null allele, causes a more complex phenotype than the one exhibited by heterozygous  
532 mutants. Indeed, we observed that vB12 treatment improved the septation process of the

533 outflow tract in *Tbx1<sup>neo2/-</sup>* embryos. In addition, we found that branchiomic muscle defects  
534 were also diminished after treatment.

535 Having shown that the treatment improves a range of phenotypic abnormalities, we  
536 sought to leverage this property to identify genes and pathways dysregulated by *Tbx1*  
537 haploinsufficiency and rebalanced by vB12, these genes may be critical for the pathogenesis  
538 of the rescued phenotypes. We found that in E9.5 *Tbx1<sup>+/-</sup>* embryos, 24% of the genes  
539 dysregulated by *Tbx1* haploinsufficiency were rescued by vB12, and gene ontology analysis of  
540 the rescued genes revealed enrichment of genes involved in heart development, thus  
541 providing a transcriptional correlate of the phenotypic observations. Among the rescued  
542 genes, we noted several that are implicated in epithelial-mesenchymal transition (EMT) and  
543 we selected *Snai2*-SLUG for further studies. At E9.5, SLUG identifies a mesodermal population  
544 in the PhAp that partially overlaps with other markers of the CPM, such as TBX1, ISL1, and  
545 *Mef2c*-AHF-Cre. This suggests that the SLUG+ cell population may include SHF cardiac  
546 progenitors and branchiomic muscle progenitors of the cardiopharyngeal lineage.  
547 Importantly, the SLUG expression pattern changes in heterozygous and homozygous *Tbx1*  
548 mutants. This could be due to ectopic expression of the *Snai2* gene, or to mislocalization of  
549 SLUG+ cells. However, the second hypothesis, i.e. defective regionalization, is supported by  
550 the finding that the expression of other genes also follows similar pattern changes. In  
551 addition, the finding that NCCs, as identified by TFAP2A staining, are also mislocalized,  
552 supports the hypothesis that the *Tbx1* mutation is associated with anomalous regionalization  
553 of multiple cell lineages. It is unlikely that regionalization anomalies are due to  
554 morphogenetic defects because some of these anomalies, along with gene expression  
555 dysregulation, are also evident in the heterozygous mutants that do not show major  
556 morphogenetic defects.

557 The aggregation of SLUG+ cells, particularly evident in the 1st PA, and the segregation  
558 of these cells from the neural crest lineage, suggest that the mutation is altering mechanisms  
559 of cell sorting, a crucial process in embryonic morphogenesis. This problem may occur for a  
560 number of reasons. For example, the differential adhesion hypothesis (Steinberg, 1962)  
561 predicts that cells tend to group together if they have higher affinity with each other,  
562 compared with other neighboring cell populations. This possibility is supported by the finding  
563 that aggregated cells express higher levels of N-cadherin, a cell adhesion molecule, compared to  
564 the surrounding NCC-derived mesenchyme in the 1st PA of *Tbx1<sup>-/-</sup>* embryo. Our observations in  
565 the 1st PA of early embryos indicate that in *Tbx1* mutants, incoming mesenchymal cells fail to  
566 mix with core mesodermal cells, consistently with a differential cell adhesion hypothesis.  
567 Intermingling of Myf5+ myogenic core cells and incoming TFAP2A+ NCCs in the 1st PA of WT  
568 embryos has previously been described (Grenier et al., 2009), although the mechanisms that  
569 govern this process are not yet established. We show here that TBX1 function is part of these  
570 mechanisms, although the effectors remain to be identified. The association of *Tbx1*  
571 heterozygosity and NCCs distribution has been noted previously in the posterior pharynx  
572 (Calmont et al., 2009). Cell-cell adhesion and/or cell-ECM interactions may interfere with  
573 NCCs migration delaying proper localization. Treatment with vB12 could also target NCCs and  
574 improve their migratory potential.

575 It is tempting to speculate that lineage regionalization abnormalities are part of the  
576 pathogenetic mechanism underlying the severe developmental defects of the PhAp associated

577 with *Tbx1* mutation. Mislocalization, even transient, of different cell types may expose them to  
578 different signaling cues (or different concentrations thereof) causing further developmental  
579 defects downstream.

580 In this work, we used *Snai2* as a marker gene, but we did not address a potential role of  
581 *Snai2* in the observed phenotypes. SLUG is a transcriptional repressor that targets genes  
582 encoding adhesion molecules (such as e-cadherin) in epithelial cells, thus supporting their  
583 mobilization and mesenchymalization (Zhou et al., 2019). It is difficult to directly apply these  
584 concepts to the pharyngeal mesenchymal cells that we have studied. However, SLUG has also  
585 been associated with a number of different functions, including skeletal muscle differentiation  
586 (Tang et al., 2016) and with up-regulated N-cadherin in some contexts (review in (Loh et al.,  
587 2019)). Therefore, it would be of interest to determine in the future whether SLUG has a  
588 specific role in branchiomic muscle differentiation or development, which is impaired in  
589 *Tbx1* mutants (Grifone et al., 2008; Kelly et al., 2004).

590  
591 In summary, we show that vB12 treatment is sufficient to rescue in part several  
592 anomalies of the PhAp. We leveraged this activity to identify a set of genes, already known to  
593 be involved in heart development that may be part of or associated with the pathogenesis of  
594 TBX1-dependent phenotypes. Finally, one of these genes, encoding SLUG has been  
595 instrumental in the discovery of a novel phenotype of lineage regionalization defects.

## 596 597 **MATERIALS AND METHODS**

### 598 599 Mouse lines

600 In this work we used mouse lines previously described *Tbx1<sup>lacZ</sup>* (here referred to as  
601 *Tbx1<sup>+/-</sup>*) (Lindsay et al., 2001), *Tbx1<sup>neo2</sup>* (Zhang et al., 2006), *Tbx1<sup>cre</sup>* (Huynh et al., 2007),  
602 *Tbx1<sup>lox</sup>* (Xu et al., 2004), R26R<sup>mTmG</sup> (Muzumdar et al., 2007), and Mef2c-AHF-Cre (Verzi et al.,  
603 2005). We have crossed *Tbx1<sup>lacZ/+</sup>* mice with *Tbx1<sup>lacZ/+</sup>* or *Tbx1<sup>neo2</sup>* to generate heterozygous,  
604 wild type, null or hypomorphic embryos. We have crossed *Tbx1<sup>cre</sup>* with R26R<sup>mTmG</sup> mice to map  
605 distribution of *Tbx1*-expressing cells and their descendants. Administration of vB12  
606 (cyanocobalamin Sigma-Aldrich Prod. Number V2876) was injected intraperitoneally  
607 (20mg/Kg). The impact of vB12 on great vessels and ventricular septation defects was scored  
608 at embryonic day (E) 15.5 and E18.5. Pregnant females were injected daily from E7.5 to E11.5.  
609 Developmental stages were assessed by considering the morning of vaginal plug as E0.5.  
610 Control mice were injected with the same volume of PBS.

611 Animal studies were carried out under the auspices of the animal protocol 257/2015-  
612 PR (licensed to the A.B. laboratory) reviewed, according to Italian regulations, by the Italian  
613 Istituto Superiore di Sanità and approved by the Italian Ministero della Salute.

### 614 615 Mouse phenotyping

616 E15.5 and E18.5 embryos were examined under the stereomicroscope, fixed overnight  
617 in 4% paraformaldehyde (PFA) and E15.5 embryos embedded in paraffin, sectioned, and  
618 stained with eosin and hematoxylin. E18.5 hearts and great vessels were manually dissected  
619 and photographed under a stereomicroscope, and then embedded in paraffin, sectioned, and  
620 stained.

621

## 622 *Immunofluorescence*

623 Embryos were fixed overnight in 4% PFA and embedded in wax. For  
624 immunofluorescence analysis embedded embryos were cutted in 7µm sections. Sections were  
625 deparaffinized in xilene, rehydrated, and after antigen unmasking with citrate buffer, sections  
626 were incubated overnight at room temperature with primary antibodies (in 0.5% milk, 10%  
627 fetal bovine serum, 1% bovine serum albumin in H<sub>2</sub>O). Each experiment was repeated at least  
628 three times.

629 We used the following primary antibodies: Anti-GFP (Abcam ab13970, diluted 1:1000),  
630 Anti-SLUG (Cell Signaling, #9585, diluted 1:100); Anti-TFAP2A (Hybridoma Bank, clone 3B5,  
631 diluted 1:300); Anti-ISL1, (Hybridoma Bank, clone 39.4D5, diluted 1:100); Anti-CRE  
632 (Millipore, 69050-3, diluted 1:1000); Anti-TBX1 (Abcam, Ab18530, diluted 1:100).

633

## 634 *RNA extraction and RT-PCR*

635 Total RNA was isolated from E9.5 (22 somites) *Tbx1*<sup>+/-</sup> and *Tbx1*<sup>+/+</sup> embryos with  
636 TRIZOL (Invitrogen) and reverse-transcribed using the High Capacity cDNA reverse  
637 transcription kit (Applied Biosystem catalog. n. 4368814).

638

## 639 *RNA-seq gene expression data analysis*

640 Processing and analysis RNA-Seq data: raw data for the high-throughput sequencing of  
641 cDNA were generated with Illumina platform for strand specific paired-end reads. These  
642 reads are 125bp long. In total 8 RNA-seq samples were sequenced. The three biological  
643 replicates of RNA-seq for *Tbx1*<sup>+/-</sup> condition are indicated as *Tbx1*<sup>+/-</sup>\_rep1, *Tbx1*<sup>+/-</sup>\_rep2 and  
644 *Tbx1*<sup>+/-</sup>\_rep3, respectively. The two biological replicates of RNA-seq for heterozygous with  
645 B12 treatment are denoted *Tbx1*<sup>+/-</sup> (+vB12)\_rep1 and *Tbx1*<sup>+/-</sup> (+vB12)\_rep2 and the three  
646 biological replicates of RNA-seq for wild type condition are denoted *Tbx1*<sup>+/+</sup>\_rep1, *Tbx1*<sup>+/+</sup>  
647 \_rep2 and *Tbx1*<sup>+/+</sup>\_rep3, respectively. The quality control on raw reads was performed using  
648 FastQC (<http://www.bioinformatics.babraham.ac.uk/projects/fastqc/>).

649 Alignment of Sequence Reads: First, the reads were mapped to the mouse genome  
650 (mm9) using TopHat2 (version.2.0.7) (Trapnell et al., 2009), with the following options: -G  
651 annotation\_file.gtf --transcriptome-index transcriptome. All other parameters were used with  
652 their default values. The annotation GTF (Gene transfer format) file,  
653 *Mus\_musculus.NCBIM37.67.gtf*, was downloaded from <http://www.ensembl.org>.

654 Differential expressed genes (DEGs): Gene count matrix was obtained as output using  
655 featureCount function from Rsubread R package (version 0.5.4) on 'exon' feature type,  
656 considering reverse strand for paired end reads with the annotation GTF file. We selected the  
657 total counts on 37620 genes for differential expression analysis.

658 The raw counts were filtered applying Proportion test or a total of 14488 genes RNA-  
659 SeqGUI R package (Russo and Angelini, 2014). Principal component analysis (PCA) was  
660 performed to separate biological conditions. PCA results showed that samples clustered for  
661 different library preparations and different times and therefore raw data had to be corrected  
662 for batch effects. Firstly, we performed a complex design, considering that exist a not  
663 identified batch. We removed batch effects using ARSyNseq function from filtered gene count  
664 matrix and considering rpkm normalization approach. Then, we evaluated differential

665 expression between pair-conditions using the non-parametric NOISeqBIO function (Tarazona  
666 et al., 2015) after applying upper quartile as normalization method. A posterior probability  
667 (PP) greater or equal to 0.95 was used to determine DEGs.

668 The list of DE genes with absolute value of fold-change greater or equal 1.2 were  
669 considered for pathway analysis. In addition, we performed the pathway analysis using the  
670 g:Profiler tool (Raudvere et al., 2019), setting the organism to *mus musculus*, choosing as  
671 custom background the list of 14488 expressed genes in our system, setting the significance  
672 threshold for the multiplicity correction “fdr” (i.e, Benjamini and Hochberg FDR) with the user  
673 threshold 0.05. We limit the sources to GO, KEGG, and Human phenotype ontology databases  
674 to evaluate functional enrichment.

675

## 676 **ACKNOWLEDGEMENTS**

677 We are grateful to all members of our laboratories and colleagues of the Leducq  
678 network for helpful discussion. We also thank Rosa Ferrentino for expert laboratory  
679 assistance and Elizabeth Illingworth for critical reading of the manuscript. We thanks  
680 Salvatore Arbucci for his technical support for for the acquisition of images under the  
681 confocal microscope and IGB microscopy facility. We thanks Lucia Mele for her technical  
682 support in mouse treatments and IGB mouse facility.

683 This work was funded by the Fondation Leducq Transatlantic Network of Excellence  
684 15CVD01 (to AB and RGK), a grant from the Italian Ministry of University and Research PRIN  
685 20179J2P9J (to AB).

686

## 687 **AUTHOR CONTRIBUTIONS**

688 AB: Conceptualization, Writing – Original Draft, Supervision, Funding Acquisition; AN:  
689 Investigation, Formal analysis, Writing – Review & Editing. AR, ED, and MB: Investigation; CA:  
690 Formal analysis, Supervision, Writing – Review & Editing; GL: Conceptualization,  
691 Investigation, Formal analysis, Supervision, Writing – Review & Editing; MF: Formal analysis;  
692 RGK: Funding Acquisition, Writing – Review & Editing.

693

## 694 **DECLARATION OF INTERESTS**

695 The authors declare no competing interests.

696 **REFERENCES**

697

- 698 Adachi N, Bilio M, Baldini A, Kelly RG. 2020. Cardiopharyngeal mesoderm origins of  
699 musculoskeletal and connective tissues in the mammalian pharynx. *Development*  
700 **147**:10.1242/dev.185256. doi:10.1242/dev.185256
- 701 Alimperti S, Andreadis ST. 2015. CDH2 and CDH11 act as regulators of stem cell fate decisions.  
702 *Stem Cell Res* **14**:270–282. doi:10.1016/j.scr.2015.02.002
- 703 Calmont A, Ivins S, Van Bueren KL, Papangeli I, Kyriakopoulou V, Andrews WD, Martin JF,  
704 Moon AM, Illingworth EA, Basson MA, Scambler PJ. 2009. Tbx1 controls cardiac neural  
705 crest cell migration during arch artery development by regulating Gbx2 expression in  
706 the pharyngeal ectoderm. *Development* **136**:3173–83.
- 707 Dastjerdi A, Robson L, Walker R, Hadley J, Zhang Z, Rodriguez-Niedenfuhr M, Ataliotis P,  
708 Baldini A, Scambler P, Francis-West P. 2007. Tbx1 regulation of myogenic  
709 differentiation in the limb and cranial mesoderm. *Dev Dyn* **236**:353–63.
- 710 Fulcoli FG, Franzese M, Liu X, Zhang Z, Angelini C, Baldini A. 2016. Rebalancing gene  
711 haploinsufficiency in vivo by targeting chromatin. *Nat Commun* **7**:11688.  
712 doi:10.1038/ncomms11688
- 713 Graham A. 2001. The development and evolution of the pharyngeal arches. *J Anat* **199**:133–  
714 41.
- 715 Grenier J, Teillet M-A, Grifone R, Kelly RG, Duprez D. 2009. Relationship between neural crest  
716 cells and cranial mesoderm during head muscle development. *PloS One* **4**:e4381.  
717 doi:10.1371/journal.pone.0004381
- 718 Grifone R, Jarry T, Dandonneau M, Grenier J, Duprez D, Kelly RG. 2008. Properties of  
719 branchiomic and somite-derived muscle development in Tbx1 mutant embryos. *Dev*  
720 *Dyn Off Publ Am Assoc Anat* **237**:3071–3078. doi:10.1002/dvdy.21718
- 721 Haddad RA, Clines GA, Wyckoff JA. 2019. A case report of T-box 1 mutation causing  
722 phenotypic features of chromosome 22q11.2 deletion syndrome. *Clin Diabetes*  
723 *Endocrinol* **5**:13. doi:10.1186/s40842-019-0087-6
- 724 Huang GY, Cooper ES, Waldo K, Kirby ML, Gilula NB, Lo CW. 1998. Gap junction-mediated cell-  
725 cell communication modulates mouse neural crest migration. *J Cell Biol* **143**:1725–34.
- 726 Huynh T, Chen L, Terrell P, Baldini A. 2007. A fate map of Tbx1 expressing cells reveals  
727 heterogeneity in the second cardiac field. *Genesis* **45**:470–5.
- 728 Ivins S, Lammerts van Beuren K, Roberts C, James C, Lindsay E, Baldini A, Ataliotis P, Scambler  
729 PJ. 2005. Microarray analysis detects differentially expressed genes in the pharyngeal  
730 region of mice lacking Tbx1. *Dev Biol* **285**:554–569. doi:10.1016/j.ydbio.2005.06.026
- 731 Jerome LA, Papaioannou VE. 2001. DiGeorge syndrome phenotype in mice mutant for the T-  
732 box gene, Tbx1. *Nat Genet* **27**:286–291.
- 733 Kelly RG, Jerome-Majewska LA, Papaioannou VE. 2004. The del22q11.2 candidate gene Tbx1  
734 regulates branchiomic myogenesis. *Hum Mol Genet* **13**:2829–2840.  
735 doi:10.1093/hmg/ddh304
- 736 Kodo K, Shibata S, Miyagawa-Tomita S, Ong S-G, Takahashi H, Kume T, Okano H, Matsuoka R,  
737 Yamagishi H. 2017. Regulation of Sema3c and the Interaction between Cardiac Neural  
738 Crest and Second Heart Field during Outflow Tract Development. *Sci Rep* **7**:6771.  
739 doi:10.1038/s41598-017-06964-9
- 740 Lania G, Bresciani A, Bisbocci M, Francone A, Colonna V, Altamura S, Baldini A. 2016. Vitamin  
741 B12 ameliorates the phenotype of a mouse model of DiGeorge syndrome. *Hum Mol*  
742 *Genet* **25**:4369–4375. doi:10.1093/hmg/ddw267
- 743 Liao J, Aggarwal VS, Nowotschin S, Bondarev A, Lipner S, Morrow BE. 2008. Identification of  
744 downstream genetic pathways of Tbx1 in the second heart field. *Dev Biol* **316**:524–37.



- 745 Liao J, Kochilas L, Nowotschin S, Arnold JS, Aggarwal VS, Epstein JA, Brown MC, Adams J,  
746 Morrow BE. 2004. Full spectrum of malformations in velo-cardio-facial  
747 syndrome/DiGeorge syndrome mouse models by altering Tbx1 dosage. *Hum Mol Genet*  
748 **13**:1577–85.
- 749 Lindsay EA, Vitelli F, Su H, Morishima M, Huynh T, Pramparo T, Jurecic V, Ogunrinu G,  
750 Sutherland HF, Scambler PJ, Bradley A, Baldini A. 2001. Tbx1 haploinsufficiency in the  
751 DiGeorge syndrome region causes aortic arch defects in mice. *Nature* **410**:97–101.
- 752 Loh C-Y, Chai JY, Tang TF, Wong WF, Sethi G, Shanmugam MK, Chong PP, Looi CY. 2019. The E-  
753 Cadherin and N-Cadherin Switch in Epithelial-to-Mesenchymal Transition: Signaling,  
754 Therapeutic Implications, and Challenges. *Cells* **8**:E1118. doi:10.3390/cells8101118
- 755 Mao A, Zhang M, Li L, Liu J, Ning G, Cao Y, Wang Q. 2021. Pharyngeal pouches provide a niche  
756 microenvironment for arch artery progenitor specification. *Dev Camb Engl*  
757 **148**:dev192658. doi:10.1242/dev.192658
- 758 Merscher S, Funke B, Epstein JA, Heyer J, Puech A, Min Lu MM, Xavier RJ, Demay MB, Russell  
759 RG, Factor S, Tokooya K, St. Jore B, Lopez M, Pandita RK, Lia M, Carrion D, Xu H, Schorle  
760 H, Kobler JB, Scambler PJ, Wynshaw-Boris A, Skoultschi AI, Morrow BE, Kucherlapati R.  
761 2001. TBX1 Is Responsible for Cardiovascular Defects in Velo-Cardio-Facial/DiGeorge  
762 Syndrome. *Cell* **104**:619–629.
- 763 Muzumdar MD, Tasic B, Miyamichi K, Li L, Luo L. 2007. A global double-fluorescent Cre  
764 reporter mouse. *Genes N Y N* **2000** **45**:593–605. doi:10.1002/dvg.20335
- 765 Pane LS, Zhang Z, Ferrentino R, Huynh T, Cutillo L, Baldini A. 2012. Tbx1 is a negative  
766 modulator of Mef2c. *Hum Mol Genet* **21**:2485–96. doi:10.1093/hmg/dd063
- 767 Paylor R, Glaser B, Mupo A, Ataliotis P, Spencer C, Sobotka A, Sparks C, Choi CH, Oghalai J,  
768 Curran S, Murphy KC, Monks S, Williams N, O'Donovan MC, Owen MJ, Scambler PJ,  
769 Lindsay E. 2006. Tbx1 haploinsufficiency is linked to behavioral disorders in mice and  
770 humans: implications for 22q11 deletion syndrome. *Proc Natl Acad Sci U A* **103**:7729–  
771 34.
- 772 Raudvere U, Kolberg L, Kuzmin I, Arak T, Adler P, Peterson H, Vilo J. 2019. g:Profiler: a web  
773 server for functional enrichment analysis and conversions of gene lists (2019 update).  
774 *Nucleic Acids Res* **47**:W191–W198. doi:10.1093/nar/gkz369
- 775 Russo F, Angelini C. 2014. RNASeqGUI: a GUI for analysing RNA-Seq data. *Bioinforma Oxf Engl*  
776 **30**:2514–2516. doi:10.1093/bioinformatics/btu308
- 777 Sato A, Scholl AM, Kuhn EN, Kuhn EB, Stadt HA, Decker JR, Pegram K, Hutson MR, Kirby ML.  
778 2011. FGF8 signaling is chemotactic for cardiac neural crest cells. *Dev Biol* **354**:18–30.  
779 doi:10.1016/j.ydbio.2011.03.010
- 780 Shone V, Graham A. 2014. Endodermal/ectodermal interfaces during pharyngeal  
781 segmentation in vertebrates. *J Anat* **225**:479–491. doi:10.1111/joa.12234
- 782 Steinberg MS. 1962. On the mechanism of tissue reconstruction by dissociated cells. I.  
783 Population kinetics, differential adhesiveness, and the absence of directed migration.  
784 *Proc Natl Acad Sci U S A* **48**:1577–1582. doi:10.1073/pnas.48.9.1577
- 785 Swedlund B, Lescroart F. 2020. Cardiopharyngeal Progenitor Specification: Multiple Roads to  
786 the Heart and Head Muscles. *Cold Spring Harb Perspect Biol* **12**:a036731.  
787 doi:10.1101/cshperspect.a036731
- 788 Tang Y, Feinberg T, Keller ET, Li X-Y, Weiss SJ. 2016. Snail/Slug binding interactions with  
789 YAP/TAZ control skeletal stem cell self-renewal and differentiation. *Nat Cell Biol*  
790 **18**:917–929. doi:10.1038/ncb3394
- 791 Tarazona S, Furió-Tarí P, Turrà D, Pietro AD, Nueda MJ, Ferrer A, Conesa A. 2015. Data quality  
792 aware analysis of differential expression in RNA-seq with NOISeq R/Bioc package.  
793 *Nucleic Acids Res* **43**:e140. doi:10.1093/nar/gkv711

- 794 Trapnell C, Pachter L, Salzberg SL. 2009. TopHat: discovering splice junctions with RNA-Seq.  
795 *Bioinforma Oxf Engl* **25**:1105–1111. doi:10.1093/bioinformatics/btp120
- 796 Verzi MP, McCulley DJ, De Val S, Dodou E, Black BL. 2005. The right ventricle, outflow tract,  
797 and ventricular septum comprise a restricted expression domain within the  
798 secondary/anterior heart field. *Dev Biol* **287**:134–45.
- 799 Wang W, Niu X, Stuart T, Jullian E, Mauck WM, Kelly RG, Satija R, Christiaen L. 2019. A single-  
800 cell transcriptional roadmap for cardiopharyngeal fate diversification. *Nat Cell Biol*  
801 **21**:674–686. doi:10.1038/s41556-019-0336-z
- 802 Warkala M, Chen D, Ramirez A, Jubran A, Schonning MJ, Wang X, Zhao H, Astrof S. 2020. Cell -  
803 ECM Interactions Play Multiple Essential Roles in Aortic Arch Development. *Circ Res*.  
804 doi:10.1161/CIRCRESAHA.120.318200
- 805 Xu H, Morishima M, Wylie JN, Schwartz RJ, Bruneau BG, Lindsay EA, Baldini A. 2004. Tbx1 has  
806 a dual role in the morphogenesis of the cardiac outflow tract. *Development* **131**:3217–  
807 27.
- 808 Xu Y-J, Chen S, Zhang J, Fang S-H, Guo Q-Q, Wang J, Fu Q-H, Li F, Xu R, Sun K. 2014. Novel TBX1  
809 loss-of-function mutation causes isolated conotruncal heart defects in Chinese patients  
810 without 22q11.2 deletion. *BMC Med Genet* **15**:78. doi:10.1186/1471-2350-15-78
- 811 Yagi H, Furutani Y, Hamada H, Sasaki T, Asakawa S, Minoshima S, Ichida F, Joo K, Kimura M,  
812 Imamura S, Kamatani N, Momma K, Takao A, Nakazawa M, Shimizu N, Matsuoka R.  
813 2003. Role of TBX1 in human del22q11.2 syndrome. *Lancet* **362**:1366–1373.
- 814 Zhang Z, Baldini A. 2008. In vivo response to high-resolution variation of Tbx1 mRNA dosage.  
815 *Hum Mol Genet* **17**:150–7.
- 816 Zhang Z, Huynh T, Baldini A. 2006. Mesodermal expression of Tbx1 is necessary and sufficient  
817 for pharyngeal arch and cardiac outflow tract development. *Development* **133**:3587–  
818 3595.
- 819 Zhou W, Gross KM, Kuperwasser C. 2019. Molecular regulation of Snai2 in development and  
820 disease. *J Cell Sci* **132**. doi:10.1242/jcs.235127
- 821 Zweier C, Sticht H, Aydin-Yaylagul I, Campbell CE, Rauch A. 2007. Human TBX1 missense  
822 mutations cause gain of function resulting in the same phenotype as 22q11.2 deletions.  
823 *Am J Hum Genet* **80**:510–7.
- 824
- 825
- 826
